# Supplementary material for: Filling the Gaps in the Pharmacy Workforce in Post-Conflict Areas: Experience from Four Countries in Sub-Saharan Africa
Source: MDPI journal article supplement (doi:10.3390/ijerph18158132), 2021-07-31
Supplement: s1 [file s1]

# **Codebook**

## **Service.Availability.Barrier**

Part A Q1 - pharmacy service availability

## **Workforce.Who**

Part B Q1 - Who is offering pharmacy services?

## **Sustainability.Retention.Yes**

Part C Q1 - Will you stay in this field in the next 3-5 years? Why or why not?

## **Service.Availability.Type.Hospital**

Part A Q1 - pharmacy service availability

## **Service.Quality.Good**

Part A Q2 - pharmacy service quality

## **Service.Challenge**

Part A Q3 - Challenges in providing pharmacy services in the field

## **ConflictSpecific**

General classification of code

## **Service.Quality.Bad**

Part A Q2 - pharmacy service quality

## **Workforce.How**

Part B Q2 - How did you get recruited or involved in this pharmacy role?

## **Workforce.What**

Part B Q3 - What former experience, training and support did you have?

## **Workforce.Challenge**

Part B Q4 - What are the challenges you observed in the pharmacy workforce in this country?

## **Sustainability.Retention.No**

Part C Q1 - Will you stay in this field in the next 3-5 years? Why or why not?

## **Strategies.Observed**

What are the good practices or strategies that you have observed that can be useful for countries in a similar context?

## **OtherExp.Volunteer**

Other experience in conflict / post-conflict settings (volunteering)

## **OtherExp.Mission**

Other experience in conflict / post-conflict settings (contract-based)

## **PharRole**

Description of the role & duty as a pharmacist in the country.

## **Service.Availability.Type.HealthUnit**

Part A Q1 - pharmacy service availability

## **Service.Availability.Free**

## **Service.Availability.Type.Locum**

Part A Q1 - pharmacy service availability

## **Service.Availability.Cost**

## **Provider.NGO**

**Provider.Government**

**Provider.Private**

**Service.Availability.Type.Mobile**

Part A Q1 - pharmacy service availability

**Strategies.Imagined**

What are the good practices or strategies that you think might be useful for countries in a similar context?

**PositiveNote.Competent&Learn**

Competency and eagerness to learn observed in subordinates / other health care staff

**PositiveNote.Trust**

**PositiveNote.Prepare**

Pre-deployment preparation

**PostiveNote.Understanding**

**Humanitarianism**

**Gradient**

Within country differences due to conflict hotspot distribution and urban vs. rural settings.

## **Strategies.Observed.Preparedness**

### **PositiveNote.Coordination**

Coordination in humanitarian care provision observed among actors

### **NegativeNote.Hostility**

Local community / health workers / armed group / patient's family showing sentiment or hostility against foreign health care staff

### **NegativeNote.Mentality**

Mentality of subordinates / other health care staff

## **Service.Availability.Type.Traditional**

### **Provider.Religious**

### **PositiveNote.Conscience**
